# Supplementary material for: Predicting the functional consequences of non-synonymous single nucleotide polymorphisms in IL8 gene
Source: PubMed Central journal article supplement (PMC5529537; doi:10.1038/s41598-017-06575-4), 2017-07-26
Supplement: 41598_2017_6575_MOESM1_ESM.pdf [file 41598_2017_6575_MOESM1_ESM.pdf]

**Predicting the functional consequences of non-synonymous single nucleotide polymorphisms in *IL8* gene**

**Tikam Chand Dakal<sup>1#</sup>, Deepak Kala<sup>2</sup>, Gourav Dhiman<sup>2</sup>, Vinod Yadav<sup>3</sup>,**

**Andrey Krokhotin<sup>4</sup>, Nikolay V. Dokholyan<sup>4</sup>**

<sup>1</sup>Department of Biosciences, Manipal University Jaipur, Dehmi Kalan, Off Jaipur-Ajmer Expressway, Jaipur-303007, Rajasthan (India)

<sup>2</sup>University Institute of Biopharma Sciences, Chandigarh University, Mohali-140413, Punjab (India)

<sup>3</sup>Department of Microbiology, Central University of Haryana, Mahendergarh-123029, Haryana (India)

<sup>4</sup> Department of Biochemistry and Biophysics, University of North Carolina, Chapel Hill, NC 27599, USA

Legends for Supplemental Table

Table 1S. Sequence homology-based prediction of both damaging and tolerated coding nsSNPs in *IL8* gene using SIFT and PROVEAN.

**Supplemental Table S1**

| SNP rsID    | Codons  | Substitution | SNP Type      | SIFT prediction |       | PROVEAN prediction |       |
|-------------|---------|--------------|---------------|-----------------|-------|--------------------|-------|
|             |         |              |               | Prediction      | Score | Prediction         | Score |
| rs572157399 | ATG-gTG | *1V          | Nonsynonymous | Not scored      | N/A   | N/A                | N/A   |
| rs202071309 | AAG-AcG | K4T          | Nonsynonymous | Damaging        | 0     | Neutral            | -2.4  |
| rs563959935 | CTG-CaG | L5Q          | Nonsynonymous | Damaging        | 0.01  | Deleterious        | -3.14 |
| rs200602609 | GCC-tCC | A6S          | Nonsynonymous | Tolerated       | 0.42  | Neutral            | -0.8  |
| rs202202182 | GCT-GaT | A8D          | Nonsynonymous | Damaging        | 0     | Deleterious        | -3.66 |
| rs564043731 | CTC-tTC | L9F          | Nonsynonymous | Tolerated       | 0.39  | Neutral            | -2.35 |
| rs200254616 | CTG-CaG | L14Q         | Nonsynonymous | Damaging        | 0     | Deleterious        | -4.63 |
| rs763622469 | GAA-GAc | E21D         | Nonsynonymous | Damaging        | 0     | Neutral            | -1.47 |
| rs751273843 | GGT-aGT | G22S         | Nonsynonymous | Tolerated       | 0.1   | Neutral            | -1.54 |
| rs767339386 | CCA-aCA | P26T         | Nonsynonymous | Tolerated       | 1     | Neutral            | -0.25 |
| rs199855020 | AGT-cGT | S28R         | Nonsynonymous | Damaging        | 0.04  | Neutral            | -1.13 |
| rs755727808 | AAA-tAA | K30*         | Nonsynonymous | N/A             | N/A   | N/A                | N/A   |
| rs138567132 | GAA-GcA | E31A         | Nonsynonymous | Tolerated       | 0.07  | Deleterious        | -4.96 |
| rs188378669 | GAA-tAA | E31*         | Nonsynonymous | N/A             | N/A   | N/A                | N/A   |

|                    |         |      |               |           |      |             |       |
|--------------------|---------|------|---------------|-----------|------|-------------|-------|
| <b>rs188378669</b> | GAA-aAA | E31K | Nonsynonymous | Damaging  | 0.01 | Deleterious | -3.52 |
| <b>rs149273289</b> | CAG-aAG | Q35K | Nonsynonymous | Tolerated | 0.15 | Neutral     | -2.28 |
| <b>rs149273289</b> | CAG-gAG | Q35E | Nonsynonymous | Damaging  | 0.04 | Neutral     | -2.17 |
| <b>rs745916337</b> | TAC-cAC | Y40H | Nonsynonymous | Tolerated | 1    | Neutral     | 1.17  |
| <b>rs144469788</b> | TCC-aCC | S41T | Nonsynonymous | Tolerated | 0.06 | Neutral     | -1.37 |
| <b>rs749738011</b> | TCC-TaC | S41Y | Nonsynonymous | Damaging  | 0    | Deleterious | -4.27 |
| <b>rs200107073</b> | CCT-CaT | P43H | Nonsynonymous | Tolerated | 0.2  | Neutral     | -2.41 |
| <b>rs139503118</b> | CAC-CgC | H45R | Nonsynonymous | Tolerated | 0.12 | Deleterious | -5.83 |
| <b>rs774766411</b> | AAA-gAA | K50E | Nonsynonymous | Tolerated | 0.38 | Neutral     | -1.02 |
| <b>rs202114642</b> | ATT-AaT | I55N | Nonsynonymous | Damaging  | 0.02 | Deleterious | -4.15 |
| <b>rs202114642</b> | ATT-AcT | I55T | Nonsynonymous | Tolerated | 0.39 | Neutral     | -1.49 |
| <b>rs765951700</b> | CCA-CtA | P59L | Nonsynonymous | Damaging  | 0    | Deleterious | -9.35 |
| <b>rs373821605</b> | CCA-tCA | P59S | Nonsynonymous | Tolerated | 0.3  | Deleterious | -7.21 |
| <b>rs147544998</b> | TGC-TGa | C61* | Nonsynonymous | N/A       | N/A  | N/A         | N/A   |
| <b>rs147544998</b> | TGC-TGt | C61C | Synonymous    | Tolerated | 1    | Neutral     | 0     |
| <b>rs140214046</b> | GCC-aCC | A62T | Nonsynonymous | Tolerated | 0.39 | Neutral     | -0.36 |
| <b>rs140214046</b> | GCC-tCC | A62S | Nonsynonymous | Tolerated | 0.42 | Neutral     | 0.48  |
| <b>rs758228010</b> | ACA-cCA | T64P | Nonsynonymous | Damaging  | 0.01 | Deleterious | -3.28 |
| <b>rs142957504</b> | ACA-AgA | T64R | Nonsynonymous | Damaging  | 0.01 | Deleterious | -3.53 |
| <b>rs759032011</b> | AAG-AAa | K69K | Synonymous    | Tolerated | 0.38 | Neutral     | 0     |
| <b>rs759032011</b> | AAG-AAc | K69N | Nonsynonymous | Damaging  | 0.01 | Neutral     | 0.1   |
| <b>rs759032011</b> | AAG-AAt | K69N | Nonsynonymous | Damaging  | 0.01 | Neutral     | 0.1   |
| <b>rs762899923</b> | CTT-CcT | L70P | Nonsynonymous | Damaging  | 0    | Deleterious | -6.4  |
| <b>rs751369405</b> | GAG-GAc | E75D | Nonsynonymous | Damaging  | 0.05 | Neutral     | -2.02 |
| <b>rs536774132</b> | TGT-TGa | C77* | Nonsynonymous | N/A       | N/A  | N/A         | N/A   |
| <b>rs373408845</b> | AAC-AAa | N83K | Nonsynonymous | Tolerated | 0.31 | Neutral     | 1.01  |
| <b>rs780209935</b> | TGG-TGa | W84* | Nonsynonymous | N/A       | N/A  | N/A         | N/A   |
| <b>rs753921688</b> | AGG-AaG | R87K | Nonsynonymous | Tolerated | 1    | Neutral     | 0.63  |
| <b>rs756294837</b> | AGG-AGa | R87R | Synonymous    | Tolerated | 0.67 | Neutral     | 0     |

|                    |         |       |               |            |      |             |       |
|--------------------|---------|-------|---------------|------------|------|-------------|-------|
| <b>rs756294837</b> | AGG-AGc | R87S  | Nonsynonymous | Damaging   | 0.02 | Neutral     | -2.21 |
| <b>rs779068762</b> | GTT-GcT | V88A  | Nonsynonymous | Damaging   | 0    | Deleterious | -3.4  |
| <b>rs779068762</b> | GTT-GaT | V88D  | Nonsynonymous | Damaging   | 0    | Deleterious | -5.6  |
| <b>rs200662278</b> | TTG-TaG | L93*  | Nonsynonymous | N/A        | N/A  | N/A         | N/A   |
| <b>rs185040023</b> | AAG-AgG | K94R  | Nonsynonymous | Tolerated  | 0.19 | Neutral     | -1.48 |
| <b>rs200005090</b> | GCT-GtT | A96V  | Nonsynonymous | Tolerated  | 0.11 | Neutral     | -1.3  |
| <b>rs201643630</b> | TAA-TtA | *100L | Nonsynonymous | Not scored | N/A  | N/A         | N/A   |
